# Supplementary material for: Young adults vulnerability to COVID-19 in Brazil: an overview across the country
Source: bioRxiv or medRxiv preprint supplement (doi:10.1101/2021.09.27.21264086), 2021-09-29
Supplement: Supplementary file [file media-1.pdf]

# Young adults vulnerability to COVID-19 in Brazil: an overview across the country

**Fernanda Sumika Hojo de Souza<sup>1,+,\*</sup>, Natália Satchiko Hojo-Souza<sup>2,+</sup>, Daniela Carine Ramires de Oliveira<sup>3</sup>, Cristiano Maciel da Silva<sup>4</sup>, and Daniel Ludovico Guidoni<sup>1</sup>**

<sup>1</sup>Federal University of São João del-Rei, Department of Computer Science, São João del-Rei, 36301-360, Brazil

<sup>2</sup>Oswaldo Cruz Foundation – Minas, Laboratory of Immunopathology, Belo Horizonte, 30190-002, Brazil

<sup>3</sup>Federal University of São João del-Rei, Department of Mathematics and Statistics, São João del-Rei, 36307-334, Brazil

<sup>4</sup>Federal University of São João del-Rei, Department of Technology, Ouro Branco, 36420-000, Brazil

\*fsumika@ufsj.edu.br

+these authors contributed equally to this work

## ABSTRACT

Brazil is a country of continental dimensions, where many smaller countries would fit. In addition to demographic, socioeconomic, and cultural differences, hospital infrastructure and healthcare varies across all 27 federative units. Therefore, the evolution of COVID-19 pandemic did not manifest itself in a homogeneous and predictable trend across the nation. In late 2020 and early 2021, new waves of the COVID-19 outbreak have caused an unprecedented sanitary collapse in Brazil. Unlike the first COVID-19 wave, in subsequent waves, preliminary evidence has pointed to an increase in the daily reported cases among younger people being hospitalized, overloading the healthcare system. In this comprehensive retrospective study, confirmed cases of hospitalization, ICU admission, IMV requirement and in-hospital death from Brazilian COVID-19 patients throughout 2020 until the beginning of 2021 were analyzed through a spatio-temporal study for patients aged 20-59 years. All Brazilian federative units had their data disaggregated in six periods of ten epidemiological weeks each. We found that there is a wide variation in the waves dynamic due to SARS-CoV-2 infection, both in the first and in subsequent outbreaks in different federative units over the analyzed periods. As a result, atypical waves can be seen in the Brazil data as a whole. The analysis showed that Brazil is experiencing a numerical explosion of hospitalizations and deaths for patients aged 20-59 years, especially in the state of São Paulo, with a similar proportion of hospitalizations for this age group but higher proportion of deaths compared to the first wave.

## Supplementary Material

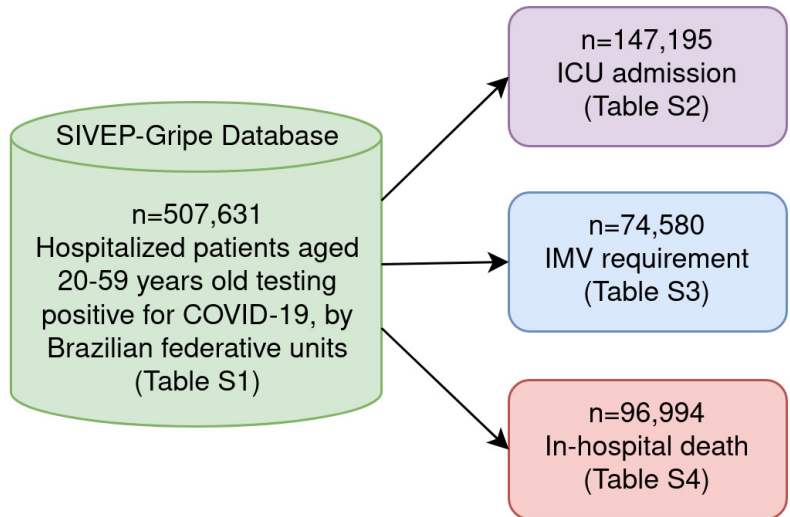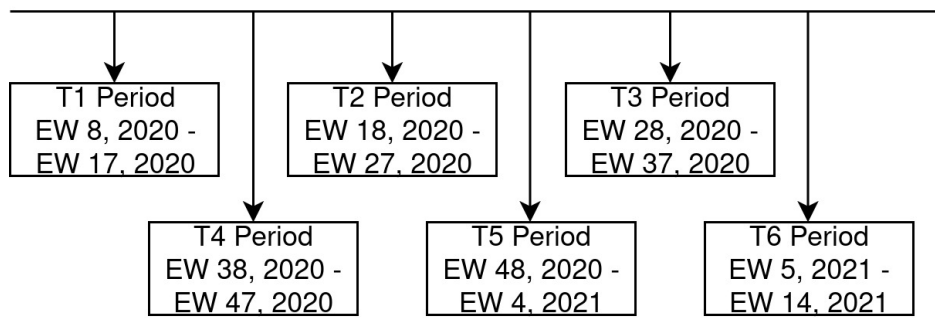

**Figure S1. Diagram of the study population.** Data regarding hospitalized patients aged 20-59 years old testing positive for COVID-19 retrieved from SIVEP-Gripe Database and stratified to account for ICU admission, IMV requirement and in-hospital death. Six periods of 10 weeks each, according to epidemiological weeks of the onset of symptoms.

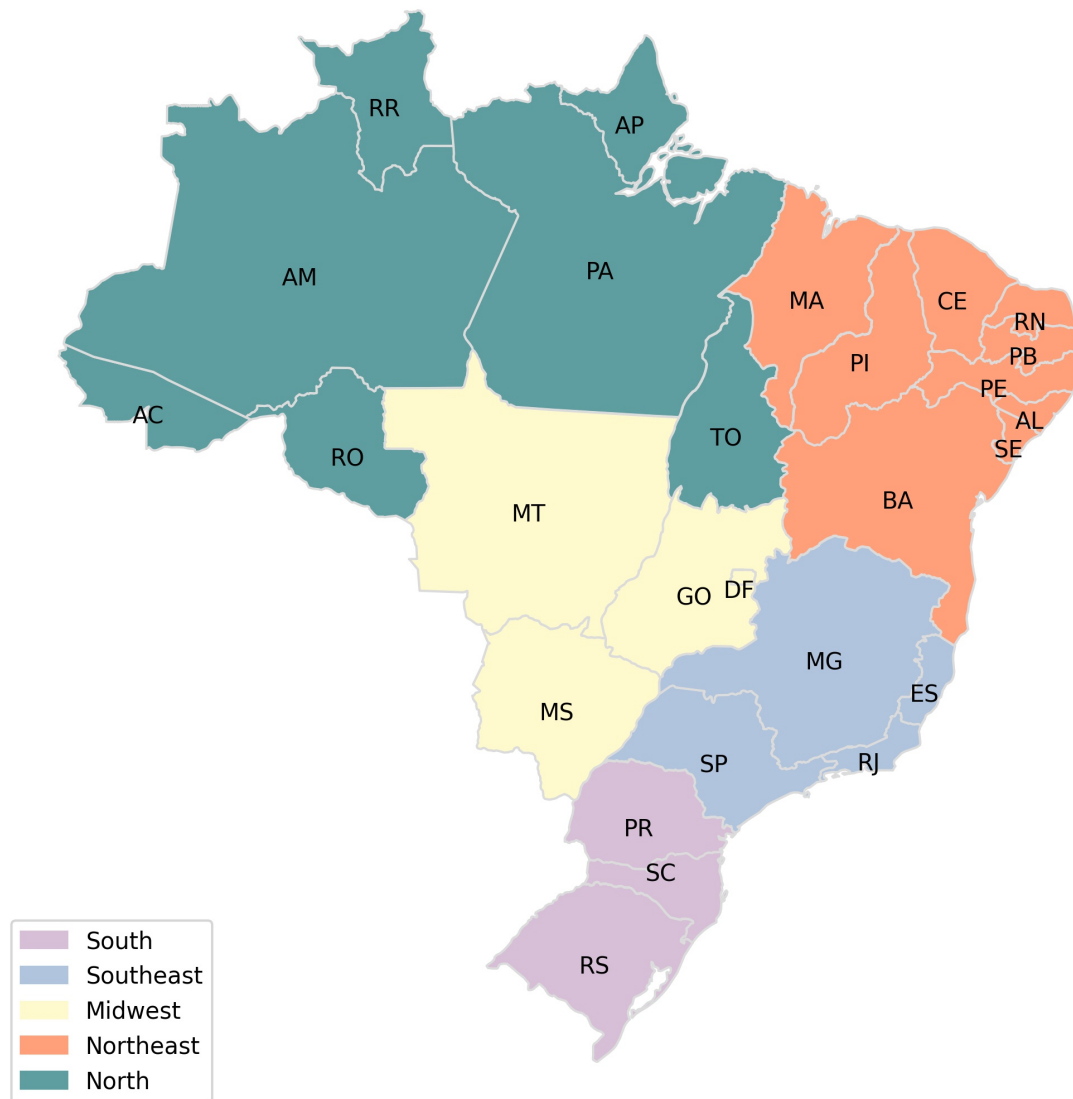

**Figure S2. Brazilian Regions.** Brazil is divided into five regions by the Brazilian Institute of Geography and Statistics (IBGE). The federative units are grouped according to geographic, social and economic factors. Brazilian federative units: Acre (AC), Alagoas (AL), Amazonas (AM), Amapá (AP), Bahia (BA), Ceará (CE), Distrito Federal (DF), Espírito Santo (ES), Goiás (GO), Maranhão (MA), Minas Gerais (MG), Mato Grosso do Sul (MS), Mato Grosso (MT), Pará (PA), Paraíba (PB), Pernambuco (PE), Piauí (PI), Paraná (PR), Rio de Janeiro (RJ), Rio Grande do Norte (RN), Rondônia (RO), Roraima (RR), Rio Grande do Sul (RS), Santa Catarina (SC), Sergipe (SE), São Paulo (SP), Tocantins (TO).

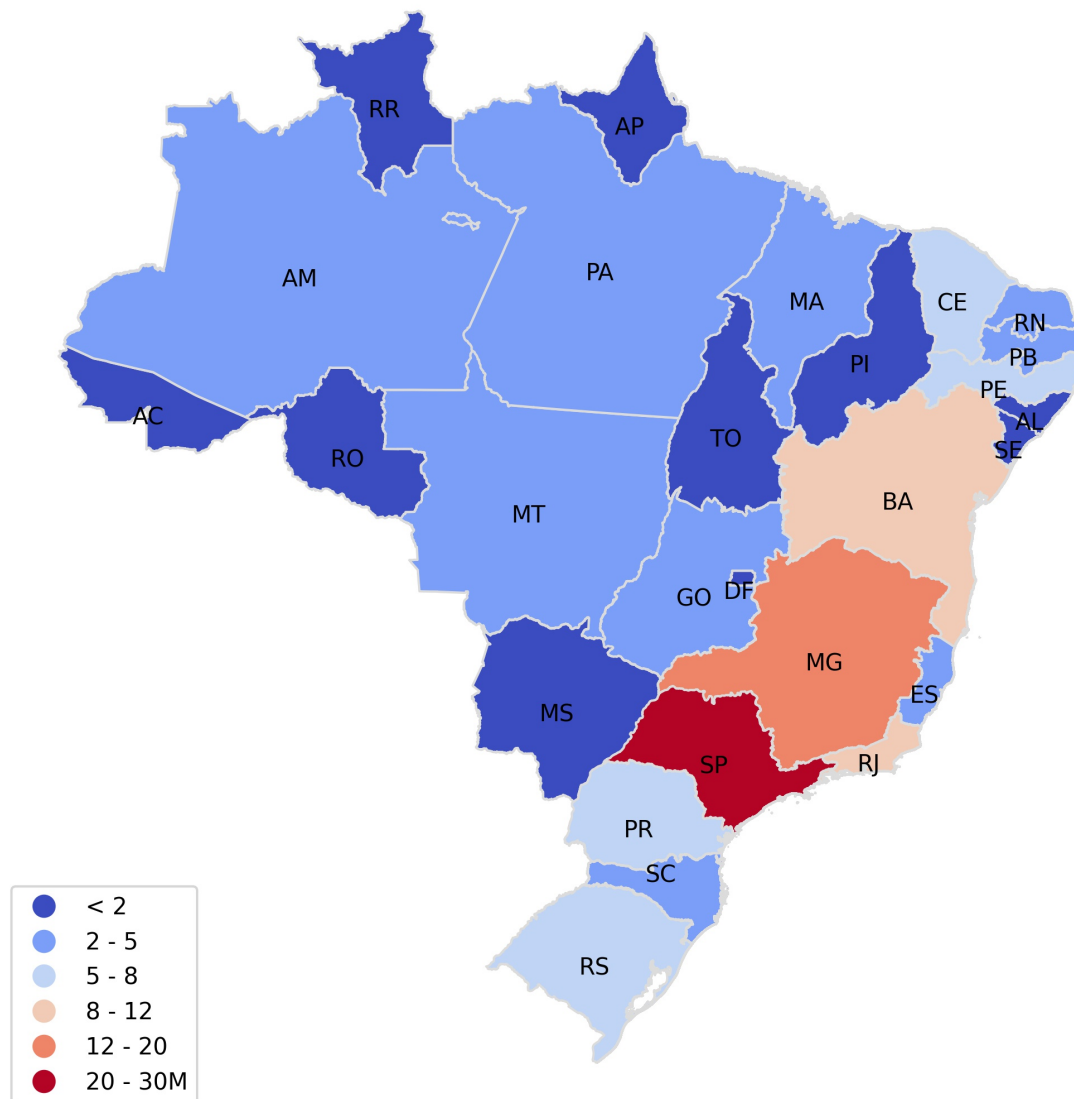

**Figure S3. Population aged 20-59 in federative units of Brazil.** Estimates for the total population aged 20-59 according to the Brazilian Institute of Geography and Statistics (IBGE). Numbers are given in millions.

**Table S1.** Number of SARI hospitalizations among COVID-19 patients according to the Brazilian federative unit, age group and outbreak periods.

|                   | T1 (%)                 | T2 (%)                  | T3 (%)                  | T4 (%)                  | T5 (%)                  | T6 (%)                  | Total (%)                 |
|-------------------|------------------------|-------------------------|-------------------------|-------------------------|-------------------------|-------------------------|---------------------------|
| <b>all</b>        | <b>54,810 (100.00)</b> | <b>196,510 (100.00)</b> | <b>166,982 (100.00)</b> | <b>115,762 (100.00)</b> | <b>200,450 (100.00)</b> | <b>375,941 (100.00)</b> | <b>1,110,455 (100.00)</b> |
| <b>20-59</b>      | <b>28,664 (52.30)</b>  | <b>88,877 (45.23)</b>   | <b>71,299 (42.70)</b>   | <b>49,649 (42.89)</b>   | <b>82,703 (41.26)</b>   | <b>186,439 (49.59)</b>  | <b>507,631 (45.71)</b>    |
| AC                | 45 (0.08)              | 308 (0.16)              | 143 (0.09)              | 171 (0.15)              | 282 (0.14)              | 444 (0.12)              | 1,393 (0.13)              |
| AL                | 216 (0.39)             | 1,563 (0.80)            | 373 (0.22)              | 283 (0.24)              | 887 (0.44)              | 1,901 (0.51)            | 5,223 (0.47)              |
| AM                | 1,649 (3.01)           | 2,382 (1.21)            | 1,163 (0.70)            | 1,424 (1.23)            | 5,533 (2.76)            | 2,785 (0.74)            | 14,936 (1.35)             |
| AP                | 56 (0.10)              | 341 (0.17)              | 136 (0.08)              | 339 (0.29)              | 347 (0.17)              | 598 (0.16)              | 1,817 (0.16)              |
| BA                | 374 (0.68)             | 3,412 (1.74)            | 2,600 (1.56)            | 1,805 (1.56)            | 2,982 (1.49)            | 6,674 (1.78)            | 17,847 (1.61)             |
| CE                | 1,673 (3.05)           | 4,672 (2.38)            | 1,392 (0.83)            | 959 (0.83)              | 1,613 (0.80)            | 6,758 (1.80)            | 17,067 (1.54)             |
| DF                | 185 (0.34)             | 2,930 (1.49)            | 3,823 (2.29)            | 1,335 (1.15)            | 1,467 (0.73)            | 4,979 (1.32)            | 14,719 (1.33)             |
| ES                | 215 (0.39)             | 1,153 (0.59)            | 508 (0.30)              | 468 (0.40)              | 526 (0.26)              | 1,127 (0.30)            | 3,997 (0.36)              |
| GO                | 131 (0.24)             | 1,940 (0.99)            | 4,203 (2.52)            | 1,836 (1.59)            | 2,476 (1.24)            | 7,999 (2.13)            | 18,585 (1.67)             |
| MA                | 717 (1.31)             | 1,130 (0.58)            | 374 (0.22)              | 179 (0.15)              | 430 (0.21)              | 1,855 (0.49)            | 4,685 (0.42)              |
| MG                | 367 (0.67)             | 4,556 (2.32)            | 6,229 (3.73)            | 4,080 (3.52)            | 8,061 (4.02)            | 18,507 (4.92)           | 41,800 (3.76)             |
| MS                | 49 (0.09)              | 699 (0.36)              | 1,823 (1.09)            | 1,282 (1.11)            | 2,079 (1.04)            | 3,631 (0.97)            | 9,563 (0.86)              |
| MT                | 95 (0.17)              | 1,767 (0.90)            | 1,661 (0.99)            | 648 (0.56)              | 1,465 (0.73)            | 2,423 (0.64)            | 8,059 (0.73)              |
| PA                | 1,643 (3.00)           | 3,976 (2.02)            | 1,440 (0.86)            | 862 (0.74)              | 1,829 (0.91)            | 4,479 (1.19)            | 14,229 (1.28)             |
| PB                | 215 (0.39)             | 1,720 (0.88)            | 964 (0.58)              | 830 (0.72)              | 1,028 (0.51)            | 2,872 (0.76)            | 7,629 (0.69)              |
| PE                | 2,611 (4.76)           | 5,070 (2.58)            | 1,685 (1.01)            | 963 (0.83)              | 1,063 (0.53)            | 1,618 (0.43)            | 13,010 (1.17)             |
| PI                | 134 (0.24)             | 1,716 (0.87)            | 1,108 (0.66)            | 839 (0.72)              | 779 (0.39)              | 1,968 (0.52)            | 6,544 (0.59)              |
| PR                | 284 (0.52)             | 2,922 (1.49)            | 4,990 (2.99)            | 4,078 (3.52)            | 6,276 (3.13)            | 13,410 (3.57)           | 31,960 (2.88)             |
| RJ                | 5,227 (9.54)           | 8,086 (4.11)            | 4,693 (2.81)            | 5,334 (4.61)            | 6,913 (3.45)            | 11,314 (3.01)           | 41,567 (3.74)             |
| RN                | 158 (0.29)             | 1,420 (0.72)            | 461 (0.28)              | 326 (0.28)              | 817 (0.41)              | 2,352 (0.63)            | 5,534 (0.50)              |
| RO                | 87 (0.16)              | 882 (0.45)              | 912 (0.55)              | 441 (0.38)              | 894 (0.45)              | 1,987 (0.53)            | 5,203 (0.47)              |
| RR                | 22 (0.04)              | 347 (0.18)              | 125 (0.07)              | 147 (0.13)              | 331 (0.17)              | 314 (0.08)              | 1,286 (0.12)              |
| RS                | 440 (0.80)             | 2,304 (1.17)            | 4,596 (2.75)            | 3,833 (3.31)            | 4,807 (2.40)            | 16,614 (4.42)           | 32,594 (2.94)             |
| SC                | 246 (0.45)             | 1,545 (0.79)            | 3,086 (1.85)            | 2,771 (2.39)            | 3,660 (1.83)            | 9,704 (2.58)            | 21,012 (1.89)             |
| SE                | 56 (0.10)              | 1,017 (0.52)            | 728 (0.44)              | 370 (0.32)              | 876 (0.44)              | 1,771 (0.47)            | 4,818 (0.43)              |
| SP                | 11,740 (21.42)         | 30,605 (15.57)          | 21,437 (12.84)          | 13,811 (11.93)          | 24,966 (12.45)          | 57,544 (15.31)          | 160,103 (14.42)           |
| TO                | 29 (0.05)              | 414 (0.21)              | 646 (0.39)              | 235 (0.20)              | 316 (0.16)              | 811 (0.22)              | 2,451 (0.22)              |
| <b>other ages</b> | <b>26,146 (47.70)</b>  | <b>107,633 (54.77)</b>  | <b>95,683 (57.30)</b>   | <b>66,113 (57.11)</b>   | <b>117,747 (58.74)</b>  | <b>189,502 (50.41)</b>  | <b>602,824 (54.29)</b>    |
| AC                | 25 (0.05)              | 319 (0.16)              | 184 (0.11)              | 118 (0.10)              | 237 (0.12)              | 442 (0.12)              | 1,325 (0.12)              |
| AL                | 212 (0.39)             | 2,271 (1.16)            | 648 (0.39)              | 354 (0.31)              | 1,188 (0.59)            | 1,881 (0.50)            | 6,554 (0.59)              |
| AM                | 1,814 (3.31)           | 2,903 (1.48)            | 1,363 (0.82)            | 1,649 (1.42)            | 5,440 (2.71)            | 2,532 (0.67)            | 15,701 (1.41)             |
| AP                | 42 (0.08)              | 404 (0.21)              | 211 (0.13)              | 308 (0.27)              | 402 (0.20)              | 434 (0.12)              | 1,801 (0.16)              |
| BA                | 334 (0.61)             | 4,583 (2.33)            | 4,163 (2.49)            | 2,707 (2.34)            | 4,588 (2.29)            | 7,350 (1.96)            | 23,725 (2.14)             |
| CE                | 2,047 (3.73)           | 7,980 (4.06)            | 2,598 (1.56)            | 1,612 (1.39)            | 2,303 (1.15)            | 7,734 (2.06)            | 24,274 (2.19)             |
| DF                | 107 (0.20)             | 2,540 (1.29)            | 4,156 (2.49)            | 1,584 (1.37)            | 1,633 (0.81)            | 4,078 (1.08)            | 14,098 (1.27)             |
| ES                | 238 (0.43)             | 1,906 (0.97)            | 874 (0.52)              | 739 (0.64)              | 952 (0.47)              | 1,354 (0.36)            | 6,063 (0.55)              |
| GO                | 102 (0.19)             | 2,042 (1.04)            | 5,554 (3.33)            | 2,599 (2.25)            | 2,877 (1.44)            | 6,942 (1.85)            | 20,116 (1.81)             |
| MA                | 721 (1.32)             | 2,057 (1.05)            | 642 (0.38)              | 298 (0.26)              | 527 (0.26)              | 2,238 (0.60)            | 6,483 (0.58)              |
| MG                | 368 (0.67)             | 5,351 (2.72)            | 9,845 (5.90)            | 6,457 (5.58)            | 14,390 (7.18)           | 22,866 (6.08)           | 59,277 (5.34)             |
| MS                | 27 (0.05)              | 481 (0.24)              | 1,924 (1.15)            | 1,229 (1.06)            | 2,270 (1.13)            | 2,846 (0.76)            | 8,777 (0.79)              |
| MT                | 40 (0.07)              | 1,201 (0.61)            | 1,658 (0.99)            | 763 (0.66)              | 1,395 (0.70)            | 1,664 (0.44)            | 6,721 (0.61)              |
| PA                | 1,536 (2.80)           | 5,237 (2.67)            | 1,850 (1.11)            | 1,157 (1.00)            | 2,449 (1.22)            | 5,247 (1.40)            | 17,476 (1.57)             |
| PB                | 199 (0.36)             | 2,539 (1.29)            | 1,589 (0.95)            | 996 (0.86)              | 1,665 (0.83)            | 2,962 (0.79)            | 9,950 (0.90)              |
| PE                | 2,144 (3.91)           | 6,999 (3.56)            | 2,757 (1.65)            | 1,397 (1.21)            | 1,859 (0.93)            | 1,884 (0.50)            | 17,040 (1.53)             |
| PI                | 109 (0.20)             | 2,136 (1.09)            | 1,791 (1.07)            | 1,089 (0.94)            | 1,000 (0.50)            | 2,251 (0.60)            | 8,376 (0.75)              |
| PR                | 240 (0.44)             | 2,701 (1.37)            | 5,515 (3.30)            | 4,719 (4.08)            | 8,366 (4.17)            | 12,365 (3.29)           | 33,906 (3.05)             |
| RJ                | 5,659 (10.32)          | 12,912 (6.57)           | 7,619 (4.56)            | 8,942 (7.72)            | 14,226 (7.10)           | 13,944 (3.71)           | 63,302 (5.70)             |
| RN                | 130 (0.24)             | 2,030 (1.03)            | 795 (0.48)              | 427 (0.37)              | 1,172 (0.58)            | 2,359 (0.63)            | 6,913 (0.62)              |
| RO                | 67 (0.12)              | 804 (0.41)              | 833 (0.50)              | 427 (0.37)              | 1,005 (0.50)            | 1,547 (0.41)            | 4,683 (0.42)              |
| RR                | 17 (0.03)              | 408 (0.21)              | 153 (0.09)              | 120 (0.10)              | 297 (0.15)              | 259 (0.07)              | 1,254 (0.11)              |
| RS                | 348 (0.63)             | 2,400 (1.22)            | 6,597 (3.95)            | 5,508 (4.76)            | 8,165 (4.07)            | 18,209 (4.84)           | 41,227 (3.71)             |
| SC                | 179 (0.33)             | 1,332 (0.68)            | 3,549 (2.13)            | 3,357 (2.90)            | 5,249 (2.62)            | 9,174 (2.44)            | 22,840 (2.06)             |
| SE                | 54 (0.10)              | 1,533 (0.78)            | 1,177 (0.70)            | 642 (0.55)              | 1,359 (0.68)            | 1,857 (0.49)            | 6,622 (0.60)              |
| SP                | 9,368 (17.09)          | 32,144 (16.36)          | 26,748 (16.02)          | 16,575 (14.32)          | 32,316 (16.12)          | 54,121 (14.40)          | 171,272 (15.42)           |
| TO                | 19 (0.03)              | 420 (0.21)              | 890 (0.53)              | 340 (0.29)              | 417 (0.21)              | 962 (0.26)              | 3,048 (0.27)              |

**Table S2.** Number of ICU admissions among COVID-19 patients aged 20-59 according to the Brazilian federative unit and outbreak periods. ‘all’ accounts for hospitalized patients owning ICU information.

|               | <b>T1</b>     | <b>(%)</b>      | <b>T2</b>     | <b>(%)</b>      | <b>T3</b>     | <b>(%)</b>      | <b>T4</b>     | <b>(%)</b>      | <b>T5</b>     | <b>(%)</b>      | <b>T6</b>      | <b>(%)</b>      | <b>Total</b>   | <b>(%)</b>      |
|---------------|---------------|-----------------|---------------|-----------------|---------------|-----------------|---------------|-----------------|---------------|-----------------|----------------|-----------------|----------------|-----------------|
| <b>all</b>    | <b>24,181</b> | <b>(100.00)</b> | <b>78,023</b> | <b>(100.00)</b> | <b>65,261</b> | <b>(100.00)</b> | <b>45,430</b> | <b>(100.00)</b> | <b>74,628</b> | <b>(100.00)</b> | <b>166,956</b> | <b>(100.00)</b> | <b>454,479</b> | <b>(100.00)</b> |
| <b>ICU</b>    | <b>8,093</b>  | <b>(33.47)</b>  | <b>23,681</b> | <b>(30.35)</b>  | <b>20,187</b> | <b>(30.93)</b>  | <b>14,754</b> | <b>(32.48)</b>  | <b>23,912</b> | <b>(32.04)</b>  | <b>56,568</b>  | <b>(33.88)</b>  | <b>147,195</b> | <b>(32.39)</b>  |
| AC            | 0             | (0.00)          | 12            | (0.02)          | 11            | (0.02)          | 5             | (0.01)          | 19            | (0.03)          | 36             | (0.02)          | 83             | (0.02)          |
| AL            | 87            | (0.36)          | 510           | (0.65)          | 108           | (0.17)          | 86            | (0.19)          | 264           | (0.35)          | 488            | (0.29)          | 1,543          | (0.34)          |
| AM            | 353           | (1.46)          | 289           | (0.37)          | 163           | (0.25)          | 242           | (0.53)          | 1,135         | (1.52)          | 561            | (0.34)          | 2,743          | (0.60)          |
| AP            | 16            | (0.07)          | 121           | (0.16)          | 34            | (0.05)          | 65            | (0.14)          | 95            | (0.13)          | 246            | (0.15)          | 577            | (0.13)          |
| BA            | 168           | (0.69)          | 1,358         | (1.74)          | 1,089         | (1.67)          | 819           | (1.80)          | 1,243         | (1.67)          | 2,735          | (1.64)          | 7,412          | (1.63)          |
| CE            | 464           | (1.92)          | 1,104         | (1.41)          | 387           | (0.59)          | 260           | (0.57)          | 504           | (0.68)          | 1,890          | (1.13)          | 4,609          | (1.01)          |
| DF            | 76            | (0.31)          | 1,114         | (1.43)          | 954           | (1.46)          | 345           | (0.76)          | 510           | (0.68)          | 1,596          | (0.96)          | 4,595          | (1.01)          |
| ES            | 151           | (0.62)          | 615           | (0.79)          | 273           | (0.42)          | 329           | (0.72)          | 332           | (0.44)          | 676            | (0.40)          | 2,376          | (0.52)          |
| GO            | 55            | (0.23)          | 644           | (0.83)          | 1,320         | (2.02)          | 614           | (1.35)          | 897           | (1.20)          | 2,664          | (1.60)          | 6,194          | (1.36)          |
| MA            | 126           | (0.52)          | 195           | (0.25)          | 93            | (0.14)          | 62            | (0.14)          | 131           | (0.18)          | 593            | (0.36)          | 1,200          | (0.26)          |
| MG            | 128           | (0.53)          | 1,163         | (1.49)          | 1,594         | (2.44)          | 1,091         | (2.40)          | 2,089         | (2.80)          | 4,903          | (2.94)          | 10,968         | (2.41)          |
| MS            | 13            | (0.05)          | 127           | (0.16)          | 339           | (0.52)          | 238           | (0.52)          | 410           | (0.55)          | 895            | (0.54)          | 2,022          | (0.44)          |
| MT            | 29            | (0.12)          | 440           | (0.56)          | 449           | (0.69)          | 176           | (0.39)          | 370           | (0.50)          | 459            | (0.27)          | 1,923          | (0.42)          |
| PA            | 306           | (1.27)          | 635           | (0.81)          | 238           | (0.36)          | 191           | (0.42)          | 362           | (0.49)          | 1,169          | (0.70)          | 2,901          | (0.64)          |
| PB            | 59            | (0.24)          | 474           | (0.61)          | 265           | (0.41)          | 229           | (0.50)          | 250           | (0.33)          | 967            | (0.58)          | 2,244          | (0.49)          |
| PE            | 292           | (1.21)          | 733           | (0.94)          | 225           | (0.34)          | 178           | (0.39)          | 240           | (0.32)          | 408            | (0.24)          | 2,076          | (0.46)          |
| PI            | 24            | (0.10)          | 327           | (0.42)          | 270           | (0.41)          | 218           | (0.48)          | 194           | (0.26)          | 466            | (0.28)          | 1,499          | (0.33)          |
| PR            | 105           | (0.43)          | 879           | (1.13)          | 1,446         | (2.22)          | 1,151         | (2.53)          | 1,614         | (2.16)          | 4,050          | (2.43)          | 9,245          | (2.03)          |
| RJ            | 1,930         | (7.98)          | 2,748         | (3.52)          | 1,798         | (2.76)          | 1,989         | (4.38)          | 2,232         | (2.99)          | 3,966          | (2.38)          | 14,663         | (3.23)          |
| RN            | 63            | (0.26)          | 407           | (0.52)          | 169           | (0.26)          | 120           | (0.26)          | 259           | (0.35)          | 905            | (0.54)          | 1,923          | (0.42)          |
| RO            | 26            | (0.11)          | 312           | (0.40)          | 323           | (0.49)          | 206           | (0.45)          | 369           | (0.49)          | 748            | (0.45)          | 1,984          | (0.44)          |
| RR            | 8             | (0.03)          | 66            | (0.08)          | 22            | (0.03)          | 35            | (0.08)          | 60            | (0.08)          | 141            | (0.08)          | 332            | (0.07)          |
| RS            | 104           | (0.43)          | 691           | (0.89)          | 1,400         | (2.15)          | 1,231         | (2.71)          | 1,504         | (2.02)          | 5,098          | (3.05)          | 10,028         | (2.21)          |
| SC            | 77            | (0.32)          | 448           | (0.57)          | 787           | (1.21)          | 639           | (1.41)          | 890           | (1.19)          | 2,433          | (1.46)          | 5,274          | (1.16)          |
| SE            | 25            | (0.10)          | 256           | (0.33)          | 153           | (0.23)          | 80            | (0.18)          | 189           | (0.25)          | 472            | (0.28)          | 1,175          | (0.26)          |
| SP            | 3,403         | (14.07)         | 7,957         | (10.20)         | 6,176         | (9.46)          | 4,102         | (9.03)          | 7,673         | (10.28)         | 17,766         | (10.64)         | 47,077         | (10.36)         |
| TO            | 5             | (0.02)          | 56            | (0.07)          | 101           | (0.15)          | 53            | (0.12)          | 77            | (0.10)          | 237            | (0.14)          | 529            | (0.12)          |
| <b>no ICU</b> | <b>16,088</b> | <b>(66.53)</b>  | <b>54,342</b> | <b>(69.65)</b>  | <b>45,074</b> | <b>(69.07)</b>  | <b>30,676</b> | <b>(67.52)</b>  | <b>50,716</b> | <b>(67.96)</b>  | <b>110,388</b> | <b>(66.12)</b>  | <b>307,284</b> | <b>(67.61)</b>  |
| AC            | 2             | (0.01)          | 138           | (0.18)          | 72            | (0.11)          | 24            | (0.05)          | 51            | (0.07)          | 88             | (0.05)          | 375            | (0.08)          |
| AL            | 106           | (0.44)          | 709           | (0.91)          | 171           | (0.26)          | 146           | (0.32)          | 463           | (0.62)          | 941            | (0.56)          | 2,536          | (0.56)          |
| AM            | 1,059         | (4.38)          | 1,666         | (2.14)          | 835           | (1.28)          | 1,026         | (2.26)          | 3,631         | (4.87)          | 1,667          | (1.00)          | 9,884          | (2.17)          |
| AP            | 37            | (0.15)          | 201           | (0.26)          | 96            | (0.15)          | 269           | (0.59)          | 249           | (0.33)          | 336            | (0.20)          | 1,188          | (0.26)          |
| BA            | 190           | (0.79)          | 1,844         | (2.36)          | 1,292         | (1.98)          | 819           | (1.80)          | 1,495         | (2.00)          | 3,364          | (2.01)          | 9,004          | (1.98)          |
| CE            | 965           | (3.99)          | 2,900         | (3.72)          | 837           | (1.28)          | 570           | (1.25)          | 877           | (1.18)          | 3,799          | (2.28)          | 9,948          | (2.19)          |
| DF            | 106           | (0.44)          | 1,711         | (2.19)          | 2,702         | (4.14)          | 900           | (1.98)          | 856           | (1.15)          | 2,875          | (1.72)          | 9,150          | (2.01)          |
| ES            | 44            | (0.18)          | 367           | (0.47)          | 175           | (0.27)          | 105           | (0.23)          | 160           | (0.21)          | 392            | (0.23)          | 1,243          | (0.27)          |
| GO            | 75            | (0.31)          | 1,145         | (1.47)          | 2,532         | (3.88)          | 1,123         | (2.47)          | 1,401         | (1.88)          | 4,414          | (2.64)          | 10,690         | (2.35)          |
| MA            | 312           | (1.29)          | 499           | (0.64)          | 219           | (0.34)          | 85            | (0.19)          | 189           | (0.25)          | 784            | (0.47)          | 2,088          | (0.46)          |
| MG            | 229           | (0.95)          | 3,095         | (3.97)          | 4,167         | (6.39)          | 2,642         | (5.82)          | 5,252         | (7.04)          | 11,738         | (7.03)          | 27,123         | (5.97)          |
| MS            | 30            | (0.12)          | 523           | (0.67)          | 1,336         | (2.05)          | 947           | (2.08)          | 1,526         | (2.04)          | 2,337          | (1.40)          | 6,699          | (1.47)          |
| MT            | 63            | (0.26)          | 1,153         | (1.48)          | 1,086         | (1.66)          | 414           | (0.91)          | 962           | (1.29)          | 1,679          | (1.01)          | 5,357          | (1.18)          |
| PA            | 1,135         | (4.69)          | 2,976         | (3.81)          | 1,142         | (1.75)          | 632           | (1.39)          | 1,318         | (1.77)          | 2,911          | (1.74)          | 10,114         | (2.23)          |
| PB            | 134           | (0.55)          | 1,130         | (1.45)          | 665           | (1.02)          | 539           | (1.19)          | 701           | (0.94)          | 1,692          | (1.01)          | 4,861          | (1.07)          |
| PE            | 727           | (3.01)          | 1,702         | (2.18)          | 666           | (1.02)          | 346           | (0.76)          | 308           | (0.41)          | 660            | (0.40)          | 4,409          | (0.97)          |
| PI            | 104           | (0.43)          | 1,263         | (1.62)          | 763           | (1.17)          | 564           | (1.24)          | 522           | (0.70)          | 1,253          | (0.75)          | 4,469          | (0.98)          |
| PR            | 171           | (0.71)          | 1,996         | (2.56)          | 3,451         | (5.29)          | 2,851         | (6.28)          | 4,499         | (6.03)          | 8,698          | (5.21)          | 21,666         | (4.77)          |
| RJ            | 2,378         | (9.83)          | 3,965         | (5.08)          | 2,204         | (3.38)          | 2,446         | (5.38)          | 3,036         | (4.07)          | 4,770          | (2.86)          | 18,799         | (4.14)          |
| RN            | 87            | (0.36)          | 974           | (1.25)          | 285           | (0.44)          | 190           | (0.42)          | 489           | (0.66)          | 1,335          | (0.80)          | 3,360          | (0.74)          |
| RO            | 60            | (0.25)          | 432           | (0.55)          | 358           | (0.55)          | 161           | (0.35)          | 329           | (0.44)          | 889            | (0.53)          | 2,229          | (0.49)          |
| RR            | 14            | (0.06)          | 274           | (0.35)          | 101           | (0.15)          | 109           | (0.24)          | 221           | (0.30)          | 153            | (0.09)          | 872            | (0.19)          |
| RS            | 329           | (1.36)          | 1,560         | (2.00)          | 3,108         | (4.76)          | 2,495         | (5.49)          | 3,124         | (4.19)          | 10,693         | (6.40)          | 21,309         | (4.69)          |
| SC            | 146           | (0.60)          | 924           | (1.18)          | 2,050         | (3.14)          | 1,880         | (4.14)          | 2,423         | (3.25)          | 6,014          | (3.60)          | 13,437         | (2.96)          |
| SE            | 28            | (0.12)          | 643           | (0.82)          | 511           | (0.78)          | 207           | (0.46)          | 559           | (0.75)          | 1,120          | (0.67)          | 3,068          | (0.68)          |
| SP            | 7,534         | (31.16)         | 20,214        | (25.91)         | 13,760        | (21.08)         | 9,022         | (19.86)         | 15,874        | (21.27)         | 35,260         | (21.12)         | 101,664        | (22.37)         |
| TO            | 23            | (0.10)          | 338           | (0.43)          | 490           | (0.75)          | 164           | (0.36)          | 201           | (0.27)          | 526            | (0.32)          | 1,742          | (0.38)          |

**Table S3.** Number of IMV requirements among COVID-19 patients aged 20-59 according to the Brazilian federative unit and outbreak periods. ‘all’ accounts for hospitalized patients owning ventilation information. ‘no IMV’ accounts for hospitalized patients requiring Non-Invasive Ventilation (NIV) or did not require ventilation.

|               | <b>T1</b>     | <b>(%)</b>      | <b>T2</b>     | <b>(%)</b>      | <b>T3</b>     | <b>(%)</b>      | <b>T4</b>     | <b>(%)</b>      | <b>T5</b>     | <b>(%)</b>      | <b>T6</b>      | <b>(%)</b>      | <b>Total</b>   | <b>(%)</b>      |
|---------------|---------------|-----------------|---------------|-----------------|---------------|-----------------|---------------|-----------------|---------------|-----------------|----------------|-----------------|----------------|-----------------|
| <b>all</b>    | <b>22,387</b> | <b>(100.00)</b> | <b>74,263</b> | <b>(100.00)</b> | <b>62,691</b> | <b>(100.00)</b> | <b>43,712</b> | <b>(100.00)</b> | <b>72,095</b> | <b>(100.00)</b> | <b>164,204</b> | <b>(100.00)</b> | <b>439,352</b> | <b>(100.00)</b> |
| <b>IMV</b>    | <b>4,146</b>  | <b>(18.52)</b>  | <b>11,982</b> | <b>(16.13)</b>  | <b>8,978</b>  | <b>(14.32)</b>  | <b>5,527</b>  | <b>(12.64)</b>  | <b>10,441</b> | <b>(14.48)</b>  | <b>33,506</b>  | <b>(20.41)</b>  | <b>74,580</b>  | <b>(16.97)</b>  |
| AC            | 0             | (0.00)          | 10            | (0.01)          | 4             | (0.01)          | 0             | (0.00)          | 2             | (0.00)          | 41             | (0.02)          | 57             | (0.01)          |
| AL            | 72            | (0.32)          | 385           | (0.52)          | 57            | (0.09)          | 34            | (0.08)          | 82            | (0.11)          | 148            | (0.09)          | 778            | (0.18)          |
| AM            | 314           | (1.40)          | 221           | (0.30)          | 93            | (0.15)          | 155           | (0.35)          | 1,024         | (1.42)          | 444            | (0.27)          | 2,251          | (0.51)          |
| AP            | 17            | (0.08)          | 97            | (0.13)          | 16            | (0.03)          | 40            | (0.09)          | 74            | (0.10)          | 203            | (0.12)          | 447            | (0.10)          |
| BA            | 93            | (0.42)          | 686           | (0.92)          | 489           | (0.78)          | 262           | (0.60)          | 403           | (0.56)          | 1,188          | (0.72)          | 3,121          | (0.71)          |
| CE            | 392           | (1.75)          | 740           | (1.00)          | 236           | (0.38)          | 143           | (0.33)          | 270           | (0.37)          | 1,382          | (0.84)          | 3,163          | (0.72)          |
| DF            | 38            | (0.17)          | 456           | (0.61)          | 489           | (0.78)          | 118           | (0.27)          | 178           | (0.25)          | 1,139          | (0.69)          | 2,418          | (0.55)          |
| ES            | 55            | (0.25)          | 276           | (0.37)          | 91            | (0.15)          | 101           | (0.23)          | 116           | (0.16)          | 324            | (0.20)          | 963            | (0.22)          |
| GO            | 25            | (0.11)          | 304           | (0.41)          | 672           | (1.07)          | 202           | (0.46)          | 286           | (0.40)          | 1,497          | (0.91)          | 2,986          | (0.68)          |
| MA            | 64            | (0.29)          | 112           | (0.15)          | 40            | (0.06)          | 21            | (0.05)          | 52            | (0.07)          | 281            | (0.17)          | 570            | (0.13)          |
| MG            | 54            | (0.24)          | 516           | (0.69)          | 691           | (1.10)          | 421           | (0.96)          | 938           | (1.30)          | 2,774          | (1.69)          | 5,394          | (1.23)          |
| MS            | 5             | (0.02)          | 56            | (0.08)          | 205           | (0.33)          | 114           | (0.26)          | 267           | (0.37)          | 716            | (0.44)          | 1,363          | (0.31)          |
| MT            | 9             | (0.04)          | 231           | (0.31)          | 186           | (0.30)          | 56            | (0.13)          | 90            | (0.12)          | 306            | (0.19)          | 878            | (0.20)          |
| PA            | 225           | (1.01)          | 430           | (0.58)          | 131           | (0.21)          | 102           | (0.23)          | 239           | (0.33)          | 857            | (0.52)          | 1,984          | (0.45)          |
| PB            | 37            | (0.17)          | 296           | (0.40)          | 150           | (0.24)          | 111           | (0.25)          | 128           | (0.18)          | 579            | (0.35)          | 1,301          | (0.30)          |
| PE            | 170           | (0.76)          | 416           | (0.56)          | 88            | (0.14)          | 64            | (0.15)          | 67            | (0.09)          | 150            | (0.09)          | 955            | (0.22)          |
| PI            | 17            | (0.08)          | 230           | (0.31)          | 141           | (0.22)          | 97            | (0.22)          | 87            | (0.12)          | 266            | (0.16)          | 838            | (0.19)          |
| PR            | 53            | (0.24)          | 384           | (0.52)          | 656           | (1.05)          | 503           | (1.15)          | 762           | (1.06)          | 2,724          | (1.66)          | 5,082          | (1.16)          |
| RJ            | 789           | (3.52)          | 1,076         | (1.45)          | 509           | (0.81)          | 492           | (1.13)          | 723           | (1.00)          | 1,300          | (0.79)          | 4,889          | (1.11)          |
| RN            | 40            | (0.18)          | 280           | (0.38)          | 73            | (0.12)          | 51            | (0.12)          | 111           | (0.15)          | 450            | (0.27)          | 1,005          | (0.23)          |
| RO            | 17            | (0.08)          | 237           | (0.32)          | 173           | (0.28)          | 89            | (0.20)          | 261           | (0.36)          | 566            | (0.34)          | 1,343          | (0.31)          |
| RR            | 8             | (0.04)          | 94            | (0.13)          | 25            | (0.04)          | 38            | (0.09)          | 86            | (0.12)          | 170            | (0.10)          | 421            | (0.10)          |
| RS            | 55            | (0.25)          | 414           | (0.56)          | 797           | (1.27)          | 599           | (1.37)          | 812           | (1.13)          | 3,792          | (2.31)          | 6,469          | (1.47)          |
| SC            | 44            | (0.20)          | 250           | (0.34)          | 427           | (0.68)          | 354           | (0.81)          | 502           | (0.70)          | 2,006          | (1.22)          | 3,583          | (0.82)          |
| SE            | 14            | (0.06)          | 278           | (0.37)          | 148           | (0.24)          | 86            | (0.20)          | 197           | (0.27)          | 477            | (0.29)          | 1,200          | (0.27)          |
| SP            | 1,535         | (6.86)          | 3,453         | (4.65)          | 2,294         | (3.66)          | 1,250         | (2.86)          | 2,646         | (3.67)          | 9,584          | (5.84)          | 20,762         | (4.73)          |
| TO            | 4             | (0.02)          | 54            | (0.07)          | 97            | (0.15)          | 24            | (0.05)          | 38            | (0.05)          | 142            | (0.09)          | 359            | (0.08)          |
| <b>no IMV</b> | <b>18,241</b> | <b>(81.48)</b>  | <b>62,281</b> | <b>(83.87)</b>  | <b>53,713</b> | <b>(85.68)</b>  | <b>38,185</b> | <b>(87.36)</b>  | <b>61,654</b> | <b>(85.52)</b>  | <b>130,698</b> | <b>(79.59)</b>  | <b>364,772</b> | <b>(83.03)</b>  |
| AC            | 1             | (0.00)          | 128           | (0.17)          | 61            | (0.10)          | 25            | (0.06)          | 21            | (0.03)          | 71             | (0.04)          | 307            | (0.07)          |
| AL            | 109           | (0.49)          | 728           | (0.98)          | 196           | (0.31)          | 157           | (0.36)          | 545           | (0.76)          | 1,175          | (0.72)          | 2,910          | (0.66)          |
| AM            | 1,012         | (4.52)          | 1,626         | (2.19)          | 846           | (1.35)          | 1,032         | (2.36)          | 3,550         | (4.92)          | 1,759          | (1.07)          | 9,825          | (2.24)          |
| AP            | 34            | (0.15)          | 221           | (0.30)          | 114           | (0.18)          | 293           | (0.67)          | 267           | (0.37)          | 376            | (0.23)          | 1,305          | (0.30)          |
| BA            | 247           | (1.10)          | 2,377         | (3.20)          | 1,758         | (2.80)          | 1,318         | (3.02)          | 2,193         | (3.04)          | 4,675          | (2.85)          | 12,568         | (2.86)          |
| CE            | 1,046         | (4.67)          | 3,284         | (4.42)          | 960           | (1.53)          | 692           | (1.58)          | 1,081         | (1.50)          | 4,321          | (2.63)          | 11,384         | (2.59)          |
| DF            | 132           | (0.59)          | 2,364         | (3.18)          | 3,190         | (5.09)          | 1,173         | (2.68)          | 1,203         | (1.67)          | 3,580          | (2.18)          | 11,642         | (2.65)          |
| ES            | 97            | (0.43)          | 500           | (0.67)          | 266           | (0.42)          | 248           | (0.57)          | 327           | (0.45)          | 700            | (0.43)          | 2,138          | (0.49)          |
| GO            | 92            | (0.41)          | 1,355         | (1.82)          | 2,961         | (4.72)          | 1,434         | (3.28)          | 1,920         | (2.66)          | 5,374          | (3.27)          | 13,136         | (2.99)          |
| MA            | 239           | (1.07)          | 429           | (0.58)          | 241           | (0.38)          | 112           | (0.26)          | 255           | (0.35)          | 1,034          | (0.63)          | 2,310          | (0.53)          |
| MG            | 294           | (1.31)          | 3,460         | (4.66)          | 4,755         | (7.58)          | 3,201         | (7.32)          | 6,101         | (8.46)          | 13,738         | (8.37)          | 31,549         | (7.18)          |
| MS            | 32            | (0.14)          | 555           | (0.75)          | 1,364         | (2.18)          | 977           | (2.24)          | 1,555         | (2.16)          | 2,372          | (1.44)          | 6,855          | (1.56)          |
| MT            | 82            | (0.37)          | 1,220         | (1.64)          | 1,152         | (1.84)          | 528           | (1.21)          | 1,234         | (1.71)          | 1,770          | (1.08)          | 5,986          | (1.36)          |
| PA            | 1,033         | (4.61)          | 2,953         | (3.98)          | 1,195         | (1.91)          | 685           | (1.57)          | 1,410         | (1.96)          | 3,155          | (1.92)          | 10,431         | (2.37)          |
| PB            | 137           | (0.61)          | 1,244         | (1.68)          | 762           | (1.22)          | 646           | (1.48)          | 811           | (1.12)          | 1,978          | (1.20)          | 5,578          | (1.27)          |
| PE            | 776           | (3.47)          | 1,778         | (2.39)          | 660           | (1.05)          | 379           | (0.87)          | 380           | (0.53)          | 779            | (0.47)          | 4,752          | (1.08)          |
| PI            | 101           | (0.45)          | 1,338         | (1.80)          | 889           | (1.42)          | 705           | (1.61)          | 631           | (0.88)          | 1,564          | (0.95)          | 5,228          | (1.19)          |
| PR            | 216           | (0.96)          | 2,428         | (3.27)          | 4,170         | (6.65)          | 3,484         | (7.97)          | 5,252         | (7.28)          | 9,707          | (5.91)          | 25,257         | (5.75)          |
| RJ            | 3,140         | (14.03)         | 5,221         | (7.03)          | 3,260         | (5.20)          | 3,689         | (8.44)          | 4,406         | (6.11)          | 7,307          | (4.45)          | 27,023         | (6.15)          |
| RN            | 108           | (0.48)          | 1,049         | (1.41)          | 360           | (0.57)          | 261           | (0.60)          | 653           | (0.91)          | 1,777          | (1.08)          | 4,208          | (0.96)          |
| RO            | 65            | (0.29)          | 501           | (0.67)          | 524           | (0.84)          | 299           | (0.68)          | 549           | (0.76)          | 1,189          | (0.72)          | 3,127          | (0.71)          |
| RR            | 14            | (0.06)          | 218           | (0.29)          | 90            | (0.14)          | 108           | (0.25)          | 203           | (0.28)          | 117            | (0.07)          | 750            | (0.17)          |
| RS            | 358           | (1.60)          | 1,782         | (2.40)          | 3,652         | (5.83)          | 3,060         | (7.00)          | 3,806         | (5.28)          | 12,270         | (7.47)          | 24,928         | (5.67)          |
| SC            | 169           | (0.75)          | 1,039         | (1.40)          | 2,304         | (3.68)          | 2,101         | (4.81)          | 2,713         | (3.76)          | 6,258          | (3.81)          | 14,584         | (3.32)          |
| SE            | 37            | (0.17)          | 607           | (0.82)          | 514           | (0.82)          | 178           | (0.41)          | 499           | (0.69)          | 1,092          | (0.67)          | 2,927          | (0.67)          |
| SP            | 8,648         | (38.63)         | 23,552        | (31.71)         | 17,000        | (27.12)         | 11,222        | (25.67)         | 19,853        | (27.54)         | 42,016         | (25.59)         | 122,291        | (27.83)         |
| TO            | 22            | (0.10)          | 324           | (0.44)          | 469           | (0.75)          | 178           | (0.41)          | 236           | (0.33)          | 544            | (0.33)          | 1,773          | (0.40)          |

**Table S4.** Number of deaths among COVID-19 patients aged 20-59 according to the Brazilian federative unit and outbreak periods. ‘all’ accounts for hospitalized patients with closed outcome (cure or death).

|              | T1 (%)                 | T2 (%)                 | T3 (%)                 | T4 (%)                 | T5 (%)                 | T6 (%)                  | Total (%)               |
|--------------|------------------------|------------------------|------------------------|------------------------|------------------------|-------------------------|-------------------------|
| <b>all</b>   | <b>26,896 (100.00)</b> | <b>82,244 (100.00)</b> | <b>65,525 (100.00)</b> | <b>44,155 (100.00)</b> | <b>72,958 (100.00)</b> | <b>150,104 (100.00)</b> | <b>441,882 (100.00)</b> |
| <b>death</b> | <b>5,752 (21.39)</b>   | <b>16,752 (20.37)</b>  | <b>11,080 (16.91)</b>  | <b>6,519 (14.76)</b>   | <b>13,892 (19.04)</b>  | <b>42,999 (28.65)</b>   | <b>96,994 (21.95)</b>   |
| AC           | 7 (0.03)               | 86 (0.10)              | 22 (0.03)              | 15 (0.03)              | 43 (0.06)              | 151 (0.10)              | 324 (0.07)              |
| AL           | 63 (0.23)              | 479 (0.58)             | 76 (0.12)              | 44 (0.10)              | 147 (0.20)             | 279 (0.19)              | 1,088 (0.25)            |
| AM           | 483 (1.80)             | 354 (0.43)             | 147 (0.22)             | 209 (0.47)             | 1,877 (2.57)           | 674 (0.45)              | 3,744 (0.85)            |
| AP           | 31 (0.12)              | 118 (0.14)             | 20 (0.03)              | 38 (0.09)              | 57 (0.08)              | 175 (0.12)              | 439 (0.10)              |
| BA           | 99 (0.37)              | 825 (1.00)             | 619 (0.94)             | 311 (0.70)             | 487 (0.67)             | 1,291 (0.86)            | 3,632 (0.82)            |
| CE           | 460 (1.71)             | 1,079 (1.31)           | 273 (0.42)             | 147 (0.33)             | 336 (0.46)             | 1,853 (1.23)            | 4,148 (0.94)            |
| DF           | 17 (0.06)              | 412 (0.50)             | 484 (0.74)             | 119 (0.27)             | 138 (0.19)             | 1,069 (0.71)            | 2,239 (0.51)            |
| ES           | 65 (0.24)              | 419 (0.51)             | 136 (0.21)             | 109 (0.25)             | 144 (0.20)             | 368 (0.25)              | 1,241 (0.28)            |
| GO           | 22 (0.08)              | 421 (0.51)             | 858 (1.31)             | 296 (0.67)             | 376 (0.52)             | 2,378 (1.58)            | 4,351 (0.98)            |
| MA           | 173 (0.64)             | 297 (0.36)             | 100 (0.15)             | 46 (0.10)              | 91 (0.12)              | 516 (0.34)              | 1,223 (0.28)            |
| MG           | 36 (0.13)              | 670 (0.81)             | 916 (1.40)             | 569 (1.29)             | 1,301 (1.78)           | 4,463 (2.97)            | 7,955 (1.80)            |
| MS           | 2 (0.01)               | 67 (0.08)              | 242 (0.37)             | 125 (0.28)             | 313 (0.43)             | 903 (0.60)              | 1,652 (0.37)            |
| MT           | 10 (0.04)              | 314 (0.38)             | 301 (0.46)             | 78 (0.18)              | 164 (0.22)             | 410 (0.27)              | 1,277 (0.29)            |
| PA           | 448 (1.67)             | 925 (1.12)             | 209 (0.32)             | 128 (0.29)             | 396 (0.54)             | 1,335 (0.89)            | 3,441 (0.78)            |
| PB           | 62 (0.23)              | 438 (0.53)             | 190 (0.29)             | 133 (0.30)             | 161 (0.22)             | 780 (0.52)              | 1,764 (0.40)            |
| PE           | 479 (1.78)             | 1,094 (1.33)           | 328 (0.50)             | 204 (0.46)             | 286 (0.39)             | 398 (0.27)              | 2,789 (0.63)            |
| PI           | 16 (0.06)              | 260 (0.32)             | 164 (0.25)             | 104 (0.24)             | 83 (0.11)              | 299 (0.20)              | 926 (0.21)              |
| PR           | 41 (0.15)              | 407 (0.49)             | 682 (1.04)             | 463 (1.05)             | 861 (1.18)             | 2,846 (1.90)            | 5,300 (1.20)            |
| RJ           | 1,427 (5.31)           | 2,126 (2.58)           | 965 (1.47)             | 984 (2.23)             | 1,522 (2.09)           | 2,795 (1.86)            | 9,819 (2.22)            |
| RN           | 39 (0.15)              | 377 (0.46)             | 86 (0.13)              | 58 (0.13)              | 160 (0.22)             | 562 (0.37)              | 1,282 (0.29)            |
| RO           | 19 (0.07)              | 261 (0.32)             | 156 (0.24)             | 69 (0.16)              | 241 (0.33)             | 658 (0.44)              | 1,404 (0.32)            |
| RR           | 7 (0.03)               | 123 (0.15)             | 26 (0.04)              | 29 (0.07)              | 82 (0.11)              | 198 (0.13)              | 465 (0.11)              |
| RS           | 18 (0.07)              | 320 (0.39)             | 631 (0.96)             | 464 (1.05)             | 729 (1.00)             | 3,982 (2.65)            | 6,144 (1.39)            |
| SC           | 27 (0.10)              | 179 (0.22)             | 384 (0.59)             | 269 (0.61)             | 479 (0.66)             | 1,973 (1.31)            | 3,311 (0.75)            |
| SE           | 19 (0.07)              | 361 (0.44)             | 180 (0.27)             | 58 (0.13)              | 153 (0.21)             | 392 (0.26)              | 1,163 (0.26)            |
| SP           | 1,676 (6.23)           | 4,266 (5.19)           | 2,752 (4.20)           | 1,411 (3.20)           | 3,219 (4.41)           | 12,007 (8.00)           | 25,331 (5.73)           |
| TO           | 6 (0.02)               | 74 (0.09)              | 133 (0.20)             | 39 (0.09)              | 46 (0.06)              | 244 (0.16)              | 542 (0.12)              |
| <b>cure</b>  | <b>21,144 (78.61)</b>  | <b>65,492 (79.63)</b>  | <b>54,445 (83.09)</b>  | <b>37,636 (85.24)</b>  | <b>59,066 (80.96)</b>  | <b>107,105 (71.35)</b>  | <b>344,888 (78.05)</b>  |
| AC           | 38 (0.14)              | 221 (0.27)             | 120 (0.18)             | 155 (0.35)             | 239 (0.33)             | 248 (0.17)              | 1,021 (0.23)            |
| AL           | 142 (0.53)             | 938 (1.14)             | 235 (0.36)             | 195 (0.44)             | 609 (0.83)             | 1,068 (0.71)            | 3,187 (0.72)            |
| AM           | 1,078 (4.01)           | 1,842 (2.24)           | 886 (1.35)             | 1,097 (2.48)           | 3,338 (4.58)           | 1,763 (1.17)            | 10,004 (2.26)           |
| AP           | 25 (0.09)              | 212 (0.26)             | 112 (0.17)             | 295 (0.67)             | 281 (0.39)             | 399 (0.27)              | 1,324 (0.30)            |
| BA           | 235 (0.87)             | 2,291 (2.79)           | 1,714 (2.62)           | 1,190 (2.70)           | 2,016 (2.76)           | 3,512 (2.34)            | 10,958 (2.48)           |
| CE           | 1,103 (4.10)           | 3,270 (3.98)           | 986 (1.50)             | 694 (1.57)             | 1,105 (1.51)           | 3,532 (2.35)            | 10,690 (2.42)           |
| DF           | 160 (0.59)             | 2,413 (2.93)           | 3,107 (4.74)           | 1,070 (2.42)           | 1,116 (1.53)           | 2,991 (1.99)            | 10,857 (2.46)           |
| ES           | 100 (0.37)             | 521 (0.63)             | 263 (0.40)             | 252 (0.57)             | 265 (0.36)             | 447 (0.30)              | 1,848 (0.42)            |
| GO           | 106 (0.39)             | 1,437 (1.75)           | 3,220 (4.91)           | 1,429 (3.24)           | 1,894 (2.60)           | 4,467 (2.98)            | 12,553 (2.84)           |
| MA           | 462 (1.72)             | 641 (0.78)             | 207 (0.32)             | 100 (0.23)             | 262 (0.36)             | 892 (0.59)              | 2,564 (0.58)            |
| MG           | 313 (1.16)             | 3,675 (4.47)           | 5,032 (7.68)           | 3,291 (7.45)           | 6,241 (8.55)           | 11,690 (7.79)           | 30,242 (6.84)           |
| MS           | 47 (0.17)              | 595 (0.72)             | 1,489 (2.27)           | 1,096 (2.48)           | 1,537 (2.11)           | 1,541 (1.03)            | 6,305 (1.43)            |
| MT           | 73 (0.27)              | 1,100 (1.34)           | 1,084 (1.65)           | 417 (0.94)             | 1,003 (1.37)           | 1,298 (0.86)            | 4,975 (1.13)            |
| PA           | 1,090 (4.05)           | 2,743 (3.34)           | 1,069 (1.63)           | 645 (1.46)             | 1,253 (1.72)           | 2,368 (1.58)            | 9,168 (2.07)            |
| PB           | 118 (0.44)             | 1,049 (1.28)           | 640 (0.98)             | 510 (1.16)             | 691 (0.95)             | 1,555 (1.04)            | 4,563 (1.03)            |
| PE           | 1,935 (7.19)           | 3,177 (3.86)           | 1,073 (1.64)           | 564 (1.28)             | 556 (0.76)             | 805 (0.54)              | 8,110 (1.84)            |
| PI           | 112 (0.42)             | 1,168 (1.42)           | 615 (0.94)             | 424 (0.96)             | 319 (0.44)             | 733 (0.49)              | 3,371 (0.76)            |
| PR           | 235 (0.87)             | 2,339 (2.84)           | 4,112 (6.28)           | 3,419 (7.74)           | 4,954 (6.79)           | 8,092 (5.39)            | 23,151 (5.24)           |
| RJ           | 3,083 (11.46)          | 4,950 (6.02)           | 2,645 (4.04)           | 2,851 (6.46)           | 3,917 (5.37)           | 5,179 (3.45)            | 22,625 (5.12)           |
| RN           | 107 (0.40)             | 956 (1.16)             | 327 (0.50)             | 216 (0.49)             | 502 (0.69)             | 995 (0.66)              | 3,103 (0.70)            |
| RO           | 64 (0.24)              | 576 (0.70)             | 668 (1.02)             | 306 (0.69)             | 481 (0.66)             | 642 (0.43)              | 2,737 (0.62)            |
| RR           | 14 (0.05)              | 222 (0.27)             | 97 (0.15)              | 116 (0.26)             | 240 (0.33)             | 113 (0.08)              | 802 (0.18)              |
| RS           | 419 (1.56)             | 1,964 (2.39)           | 3,898 (5.95)           | 3,212 (7.27)           | 3,603 (4.94)           | 9,659 (6.43)            | 22,755 (5.15)           |
| SC           | 213 (0.79)             | 1,286 (1.56)           | 2,565 (3.91)           | 2,316 (5.25)           | 2,879 (3.95)           | 6,304 (4.20)            | 15,563 (3.52)           |
| SE           | 34 (0.13)              | 336 (0.41)             | 174 (0.27)             | 119 (0.27)             | 200 (0.27)             | 474 (0.32)              | 1,337 (0.30)            |
| SP           | 9,827 (36.54)          | 25,333 (30.80)         | 17,693 (27.00)         | 11,522 (26.09)         | 19,404 (26.60)         | 36,067 (24.03)          | 119,846 (27.12)         |
| TO           | 11 (0.04)              | 237 (0.29)             | 414 (0.63)             | 135 (0.31)             | 161 (0.22)             | 271 (0.18)              | 1,229 (0.28)            |



**Table S5.** In-hospital fatality risk ratio of COVID-19 patients aged 20-59 years in the last wave vs. the first wave

|                           | <b>Risk Ratio<sup>a</sup></b> | <b>95% CI</b>      | <b>p-values</b>  |
|---------------------------|-------------------------------|--------------------|------------------|
| <b>Brasil (T6/T2)</b>     | <b>1.41</b>                   | <b>[1.38,1.43]</b> | <b>&lt;0.001</b> |
| Amazonas (T5/T1)          | 1.16                          | [1.07,1.26]        | <0.001           |
| Goiás (T6/T3)             | 1.65                          | [1.54,1.77]        | <0.001           |
| Minas Gerais (T6/T3)      | 1.79                          | [1.68,1.91]        | <0.001           |
| Paraná (T6/T3)            | 1.83                          | [1.69,1.97]        | <0.001           |
| Rio de Janeiro (T6/T2)    | 1.17                          | [1.11,1.22]        | <0.001           |
| Rio Grande do Sul (T6/T3) | 2.10                          | [1.94,2.26]        | <0.001           |
| Santa Catarina (T6/T3)    | 1.83                          | [1.65,2.03]        | <0.001           |
| São Paulo (T6/T2)         | 1.73                          | [1.68,1.79]        | <0.001           |

<sup>a</sup>Risk Ratio = (hCFR of the last wave)/(hCFR of the first wave). Last wave (T5 or T6) and first wave (T1, T2 or T3), according to the federative unit.
